1 **Factors Associated with the Risk of HIV Infection among HIV-exposed Infants in**  
2 **Malawi: 2013-2020**

3 Wingston Ng'ambi<sup>1,2,3\*</sup>, Janne Estill<sup>1,3,4</sup>, Fatma Aziza Merzouki<sup>1</sup>, Erol Ore<sup>1,3</sup>, Tiwonge Chimpandule<sup>5</sup>,  
4 Rose Nyirenda<sup>5</sup>, Olivia Keiser<sup>1,3</sup>

5 <sup>1</sup>Institute of Global Health, University of Geneva, Geneva, Switzerland

6 <sup>2</sup>Health Economics and Policy Unit, Kamuzu University of Health Sciences, Lilongwe, Malawi

7 <sup>3</sup>Global Research and Analyses for Public Health (GRAPH) Network, University of Geneva, Geneva,  
8 Switzerland

9 <sup>4</sup>Institute of Mathematical Statistics and Actuarial Science, University of Bern, Bern, Switzerland

10 <sup>5</sup>The Department of HIV/AIDS, Ministry of Health, Lilongwe, Malawi

11

12

13 **Paper content:**

14 Abstract word count=314

15 Narrative word count = 2842

16 References = 21

17 Figures = 2

18 Tables = 2

19

20 **\*Contact details of the corresponding author**

21 Wingston Ng'ambi

22 College of Medicine, Lilongwe Campus

23 Postal address: P.O. Box 30055, Lilongwe 3, Malawi

24 Email: [wingston.ngambi@gmail.com](mailto:wingston.ngambi@gmail.com) or [wng'ambi@medcol.mw](mailto:wng'ambi@medcol.mw)

25

26

27

28 **Abstract**

29 **Background:** Despite the high availability of individual-level data of infants accessing HIV  
30 DNA polymerase chain reaction (DNA-PCR) testing service, there has been little in-depth  
31 analysis of such data. Therefore, we describe spatial and temporal trends in risk of HIV  
32 infection among Malawi's HIV-exposed infants (HEI) with DNA-PCR HIV test result from  
33 2013 to 2020.

34 **Methods:** This is an implementation study using routinely collected patient-level HIV DNA-  
35 PCR test result data extracted from the national Laboratory Management Information System  
36 database managed by the Department of HIV/AIDS between 1 January 2013 and 30 June  
37 2020. We calculated frequencies, proportions and odds ratios (OR) with their associated 95%  
38 confidence intervals (95%CI). We performed a random-effects logistic regression to  
39 determine the risk factors associated with HIV infection in infants, controlling for the spatial  
40 autocorrelation between districts and adjusting for other variables.

41 **Results:** We evaluated 255,229 HEI across 750 facilities in 28 districts. The overall risk of  
42 HIV infection among all tested HEI between 2013 and 2020 was 7.2% (95%CI: 7.1-7.3). We  
43 observed a decreasing trend in the proportion of HEI that tested HIV positive from 7.0%  
44 (95%CI: 6.6-7.4) in 2013 to 5.7% (95%CI: 5.4-5.9) in 2015 followed by an increase to 9.9%  
45 (95%CI: 9.6-10.2) in 2017 and then a decreasing trend to 4.2% (95%CI: 3.7-4.6) in 2020.  
46 The risk of HIV infection increased by age of the HEI. There was spatial heterogeneity of  
47 HIV prevalence between districts of Malawi.

48 **Conclusion:** We summarised spatial and temporal trends of risk of HIV infection amongst  
49 HEI in Malawi between 2013 and 2020. There is need for further strengthening of EID  
50 program to ensure that all the HEI are enrolled in care by eight weeks of age in order to  
51 further reduce mother-to-child transmission of HIV.

52

53 **Key message:** There is need for further strengthening of the Malawi early infant diagnosis  
54 program to ensure that all the HIV-exposed infants are enrolled in care by eight weeks of age  
55 in order to eliminate mother-to-child transmission of HIV by 2030.

56

57

58 **Running Head:**

59 HIV prevalence among HIV-exposed Infants in Malawi

60

61 **Keywords:**

62 HIV prevalence, HIV-exposed infants, HEI, Malawi, DNA-PCR, HIV DNA Polymerase  
63 Chain Reaction Tests

64

65 **What is known about the study?**

66 Malawi has implemented the Early Infant Diagnosis (EID) since 2009. Most of the studies on  
67 EID in Malawi have focused on just one or two health facilities.

68

69 **What the study adds?**

70 This is to our knowledge the first in-depth analysis of national routine data on HIV DNA-  
71 PCR tests among HIV-exposed infants with in Malawi. Our study has shown that there is  
72 spatial and temporal heterogeneity in risk of HIV infection amongst the HEI in Malawi  
73 between 2013 and 2020.

74

75

76 **INTRODUCTION**

77 Despite the tremendous global progress in the HIV response, children continue to be  
78 affected substantially by the epidemic [1]. Of the estimated 38.0 million people living with  
79 HIV worldwide in 2020, 2.8 million were children aged 0-19 [1]. Globally, most of the  
80 children living with HIV are found in Africa. Sub-Saharan Africa has the largest burden of  
81 paediatric HIV in the world [1] [2]. In Malawi, the HIV estimates from the Spectrum

82 software indicate approximately 2500 children living with HIV and 1800 AIDS deaths among  
83 children aged below fifteen years in 2020.

84 Although several countries like Malawi, South Africa and Uganda [3] have registered  
85 very high uptake of prevention of mother to child transmission services, the uptake of  
86 services for HIV-exposed infants have been suboptimal for various reasons in most low and  
87 middle income countries (LMIC) [4]. Diagnosis of paediatric HIV has been one of the major  
88 challenges in resource-limited settings leading to lower proportion of children living with  
89 HIV who start antiretroviral therapy (ART) compared with adults [5]. The WHO guidelines  
90 recommend HIV ascertainment for exposed infants (HEI) as part of routine care, as early as 6  
91 weeks of age [5]. In Malawi, HIV DNA polymerase chain reaction (DNA-PCR) is commonly  
92 used to test HIV in HEI at registration in the Early Infant Diagnosis (EID) programme [6].

93 Malawi started the EID programme in 2009 following a recommendation by the  
94 WHO so that all infants exposed to HIV during pregnancy, labour, delivery and breastfeeding  
95 have HIV status ascertainment by the age of 6 weeks with follow up HIV tests at 12 and 24  
96 months[6]. HIV ascertainment among HEI is critical in facilitating provision of life-saving  
97 treatment for those infected with the virus and enables access to HIV prevention information  
98 and support for those testing negative. Currently over 650 facilities are providing EID  
99 services in Malawi. The Malawi Ministry of Health as well as the PEPFAR supported  
100 programmes track HIV prevalence among HIV-exposed infants. Since the introduction of this  
101 program no in-depth analyses have been done to assess the trends of HIV prevalence amongst  
102 the HEI tested EID DNA PCR at a national level. However, in-depth analyses are necessary  
103 for a greater understanding of HIV prevalence for EID program quality improvement.  
104 Furthermore, in-depth analyses of the EID program are necessary in tracking the first and  
105 second steps of the UNAIDS 95-95-95 target for ending HIV/AIDS by 2030. This study  
106 therefore aims to describe HIV prevalence trends and assess the factors associated with trends  
107 in the risk of HIV infection of HEI tested with DNA-PCR in Malawi between 2013 and 2020.

108

## 109 **METHODS**

### 110 **Study design**

111 This is an implementation study involving a retrospective review of patient-level HIV  
112 DNA-PCR data obtained from the National Laboratory Information Management Systems

113 (LIMS) national database containing data collected between 2013 and 2020 in Malawi [7].  
114 The LIMS database is managed by MOH Diagnostics in the Department of Technical and  
115 Support Services (HTSS). The LIMS database contains individual level DNA-PCR data for  
116 HIV ascertainment amongst the HIV exposed infants aged 24 months and below. Data across  
117 all the districts and facilities are included. The database has inbuilt tools for performing data  
118 quality assessment like range checks and other associated validation rules. The data are  
119 entered at the DNA-PCR laboratories in Malawi. By 30 June 2020, there were 10 laboratories  
120 performing DNA-PCR HIV testing for HIV-exposed infants in Malawi: Dream laboratory in  
121 Blantyre, Dream Laboratory in Balaka, Kamuzu Central Hospital, Mzimba District Hospital,  
122 Mzuzu central Hospital, Nsanje District Hospital, Partners in Hope, Queen Elizabeth Central  
123 Hospital, Thyolo District Hospital, and Zomba Central Hospital.

124

### 125 **Management of HIV exposed infants in Malawi**

126 The management of HIV-exposed infants (HEI) is based on the Malawi ART/PMTCT  
127 guidelines [6]. The HEI are registered in the Early Infant Diagnosis (EID) Programme at 6  
128 weeks after birth a HIV DNA-PCR test is conducted during the registration into the EID  
129 programme. In addition, HEI are put on Cotrimoxazole Preventive Therapy (CPT) to prevent  
130 certain opportunistic infections [6]. Rapid HIV diagnostic tests are done at 12 months and 24  
131 months or as necessary [6].

132

### 133 **Statistical Analysis and Data Management**

134 The data were managed in Stata v16.0 (Stata Corp., Texas, USA). The response  
135 variable was HIV infection status. The independent variables were: age (in months) at sample  
136 collection, year sample collected, sex, facility location (rural/urban) and region  
137 (north/centre/south). A descriptive analysis was first performed detailing the characteristics  
138 of the study population. We also fitted bivariate analysis of each of the independent variable  
139 and HIV status. Only the independent variables that were statistically significant at 20% were  
140 eligible for inclusion in the multivariable model. We fitted a multivariable logistic regression  
141 model of HIV infection using a forward step-wise selection method, with age and sex entered  
142 as a priori variables.

143            Since HIV prevalence varies by district, we controlled for random clustering effect of  
144 the district when conducting logistic regression of the independent variables on HIV  
145 infection. We presented both crude and adjusted odds ratios (OR) of HIV infection of each  
146 independent variable. Multiple imputation chained equations (MICE), with five imputation  
147 rounds and 5000 permutations, were used to impute missing data of the following  
148 covariables: age category when sample was taken, HIV status, child's sex and year of sample  
149 collection. The analysis produced the within district variation ( $\rho$ ) and between district  
150 variation ( $\sigma$ ) of the risk of HIV infection due to controlling for clustering effect of the district.  
151 We resented the annual the risk of HIV infection for all the districts of Malawi using a forest  
152 plot of the pooled the risk of HIV infection by districts in order to get the degree of  
153 heterogeneity of the risk of HIV infection by districts. Statistical significance was set at  
154  $P < 0.05$ .

155

#### 156 **Patient and public involvement statement**

157            Over the recent years in the implementation of HIV EID programme in Malawi, there  
158 has been need to test the HIV status of the HIV-exposed infants to determine their risk of  
159 HIV infection. This risk ascertainment begins with the enrolment of HEI into the EID  
160 programme. Every mother of HEI undergoes a counselling session in order to be sensitized  
161 on the follow-up of her child in the EID programme. The mothers of HEI ensures that the  
162 HEI get enrolled and followed up in the EID programme. All follow-up processes conform to  
163 the national HIV treatment guidelines. The results of this study will be shared with the HIV  
164 programme managers across health facilities of Malawi. This will ensure that the results  
165 inform practice at both facility and national levels.

166

#### 167 **Ethical approval**

168            The study was approved by the Malawi National Health Sciences Research  
169 Committee (NHSRC) in Lilongwe, Malawi (protocol #: 1669). As this study used secondary  
170 anonymised data, no informed consent was needed.

171

#### 172 **RESULTS**

### 173 **Characteristics of HIV-exposed infants who had DNA-PCR HIV test**

174 The characteristics of HIV exposed infants (HEI) with HIV DNA-PCR testing are  
175 shown in Table 1. We evaluated 255,229 HIV exposed infants with DNA-PCR results. Of  
176 these, 145,622 (57%) had HIV DNA-PCR testing done before two months after birth. The  
177 numbers of males and females tested for HIV were similar, 159,699 (63%) were from the  
178 southern region while 22,897 (9%) were from the northern region (Table 1). We observed an  
179 increasing trend in the number of HEI tested for HIV from 16,308 (6%) in 2013 to 43,370  
180 (17.0%) in 2018 and a decrease thereafter (Table 1). The proportion of missing data ranged  
181 from 2.9% (7,344 of 255,229) for sex of the child to 3.3% (8,354 of 255,229) for age at  
182 sample draw.

183

184

185

### 186 **Risk of HIV infection among HIV-exposed infants with HIV DNA PCR HIV test**

187 A total of 235,774 (92%) children had complete data on location and region as shown  
188 in Table 2. We observed that 16,936 (7.2%, 95%CI: 7.1-7.3) of the 235,774 HEI had positive  
189 HIV DNA-PCR results. The female and male HEI had similar HIV infection risk (see Table  
190 2). There was an increasing trend in the risk of HIV infection with age at HIV testing. The  
191 southern region had the lowest risk of HIV infection among HEI while the northern region  
192 had the highest risk of HIV infection.

193

### 194 **Temporal distribution of the HIV infection risk**

195 The trend in risk of HIV infection across the regions is shown in Figure 1. The overall  
196 risk of HIV infection dropped from 7.0% (95%CI: 6.6-7.4) in 2013 to 5.7% (95%CI: 5.4-5.9)  
197 in 2015 followed by an increase to 9.9% (95%CI: 9.6-10.2) in 2017 and then a decreasing  
198 trend to 4.2% (95%CI: 3.71-4.63) in 2020. Between 2015 and 2017, the northern, central and  
199 southern regions experienced an increase in the trend of risk of HIV infection (see Figure 1).  
200 There was strong evidence of association between the risk of HIV infection and region of  
201 residence of the HEI in Malawi between 2013 and 2020.

202

### 203 **Factors associated with the risk of HIV infection**

204 The factors associated with the risk of HIV infection are shown in Table 2. The  
205 adjusted odds of HIV infection among female HEI were 1.07 (95%CI:1.03-1.10, P<0.001)  
206 times those of male HEI. There was increasing odds of HIV infection by age at HIV testing  
207 (AOR=3.47; 95%CI: 3.33-3.62 and AOR=36.24; 95%CI:32.69-40.17) amongst those aged 2-  
208 5 and 18-24 months respectively compared to those aged less than 2 months at HIV DNA-  
209 PCR sample collection). Infants residing in urban areas had higher odds of HIV infection  
210 compared to those living in rural areas. After adjusting for age, sex, location and region, the  
211 infants that were tested between 2016 and 2019 were more likely to be HIV positive  
212 compared to those tested in 2013 (see Table 2).

213

### 214 **Spatial distribution of HIV infection**

215 The spatial distribution of HIV amongst the HIV-exposed infants is shown in Figure  
216 1. There was a strong association between HIV infection and district of residence (P<0.01).  
217 Within each district, the risk of HIV infection varied by 0.78% (95%CI: 0.42-1.44) over the  
218 2013-2020-time period as shown in Table 2. However, there was variation in risk of HIV  
219 infection across the districts ( $\sigma$ =16.13%; 95%CI: 11.88-21.90; P<0.001) as shown in Table 2.  
220 Some districts had the risk of HIV infection as high as 9.9% while in others it was as low as  
221 4.6% between 2013 and 2020 as shown in Figure 2. The six districts with the highest risk of  
222 HIV infection among HEI were Lilongwe, Likoma, Nkhatakota, Chitipa, Karonga and  
223 Nkhata Bay while the lowest risk of HIV infection was observed in Neno, Chiradzulu,  
224 Phalombe, Thyolo, Mulanje and Dedza.

225

226

### 227 **DISCUSSION**

228 This is a national analysis of HIV DNA-PCR data obtained from the laboratory  
229 management information system (LIMS) in Malawi. The overall risk of HIV infection  
230 amongst the DNA-PCR tests was high implying the need to strengthen the MTCT



231 programme. We observed increasing trend in probability of HIV infection by age at sample  
232 collection. The highest risk of HIV infection was observed among the HEI tested in 2017.  
233 HIV infection differed across the districts of origin of the HEI, and the highest risk of HIV  
234 infection were observed amongst the HEI from the Northern region. Furthermore, the odds of  
235 HIV infection were higher in urban than in rural areas.

236 The risk of HIV acquisition among infants exposed to HIV in our study was almost  
237 two times higher than that observed in South Africa [8] [9] but similar to other studies  
238 conducted in Malawi and settings India [10] [11] [16]. Consistent with other studies, the risk  
239 of HIV infection of the HEI was higher with older age at DNA-PCR sample collection [12].  
240 With the high risk of HIV infection being observed among EID in the Northern Region of  
241 Malawi, it is imperative to consider the northern region with quality improvement projects  
242 aimed at bringing down the HIV infection risk among HEI. The Northern Region does not  
243 have as many HIV implementing partners as the other regions due to funding prioritization;  
244 among the general population HIV infection risk is substantially higher in the southern and  
245 central regions than the northern region [13]. Although the risk of HIV infection has been  
246 reported to be higher amongst the female than the female population [13], we observed  
247 similar risk in HIV infection by sex of the child.

248 Our findings also demonstrate considerable heterogeneity in risk of HIV infection  
249 among the HEI in Malawi. Several spatial epidemiological studies indicate spatial variation  
250 of diseases which could be attributed to social and cultural factors [14] [15] [16]. Generally,  
251 studies of HIV epidemiology in Malawi have been highly predominant in the districts in the  
252 southern region followed by the central and northern regions [13] [17]. The spatial pattern of  
253 the risk of HIV infection would imply the need to target PMTCT interventions in the districts  
254 with high risk of paediatric HIV acquisition in order to improve the health of the children  
255 and the women [13].

256 There has been a temporal trend in HIV infection risk by year. This is consistent with  
257 many studies and surveys conducted in Malawi that have shown a downward trend in the risk  
258 of HIV infection [13]. The upward increase in the risk of HIV infection of the HIV exposed  
259 infants may have occurred as a result of a weaker implementation of PMTCT services  
260 especially with regard to follow-up of HEI which has been reported in Malawi [10]. This is  
261 also consistent with what has been observed in Sub-Saharan African settings with the general  
262 decreasing trend in HIV infection among the HIV exposed infants. Possible explanations to

263 the downward trend in HIV infections include successful implementation of PMTCT  
264 programmes and the high antiretroviral therapy coverage in general [18] [19].

265 The major strength of this study is the large sample size and being conducted within a  
266 routine programme setting, which has the potential to improve the EID programmes in  
267 Malawi and similar settings. The major limitation of this study is that the data in LIMS only  
268 cover baseline data with no follow-up tests conducted with rapid HIV diagnostic tests at 12  
269 and 24 months. The Department of HIV/AIDS of the Malawi ministry of Health and  
270 Population should make an attempt to have all HIV laboratory tests of the HIV-exposed  
271 infants recorded in the LIMS. Such data should be managed in a way that it would be  
272 possible to track the HIV-exposed infant throughout the 24 months of follow-up in the EID  
273 programme. Another limitation is that the data are not linked to data on ART initiation among  
274 the HIV-exposed infants that were found to be HIV positive. Furthermore, the maternal  
275 information was not captured in LIMS hence we could not include such information in this  
276 analysis. Having such data would provide more information on the risk factors for HIV  
277 infection on HEI.

278

## 279 **CONCLUSION**

280 In conclusion, this is to our knowledge the first in-depth analysis of national routine  
281 data on HIV DNA-PCR tests among HIV-exposed infants with in Malawi. Our study has  
282 shown that there is spatial and temporal heterogeneity in risk of HIV infection amongst the  
283 HEI in Malawi between 2013 and 2020. There is a need for further strengthening the EID  
284 program to ensure that all the HEI are enrolled in care by eight weeks of age. As this study  
285 only looks at HIV DNA-PCR test results, there is a need for a follow-up study examining risk  
286 of HIV infection in the entire twenty-four months of follow-up in order not to underestimate  
287 or over-estimate the true risk of HIV infection. Access to HIV DNA-PCR testing will ensure  
288 that 90% of the HEI with HIV will have known HIV status hence supporting the way towards  
289 reaching the 95-95-95 target HIV strategy by 2030 in Malawi [19].

290

## 291 **DECLARATIONS**

292 We declare that there is no conflict of interest in publishing this paper.

293

## 294 **AUTHORS' CONTRIBUTIONS**

295 WN led the manuscript writing, conducted data management and analysis; FAM  
296 advised on the data analysis and policy insights on the paper; JE advised on data analysis and  
297 policy insights on the paper; EO advised on data analysis and policy insights on the paper and  
298 OK advised on the analysis and policy insights on the paper. All authors read and approved  
299 the final manuscript.

300

## 301 **ACKNOWLEDGEMENTS**

302 The study was supported by a grant from the Swiss National Science Foundation (no  
303 163878). The authors would also like to thank all the parents of the HIV exposed infants  
304 together with the HEI that participated in this study. Further, the authors thank all the health  
305 facility staff that supported DNA-PCR sample collection and processing as well as  
306 counselling of the mothers of the HEI. The authors would also like to thank the Department  
307 of HIV/AIDS for allowing them to extract and analyse the data.

308

## 309 **REFERENCES**

- 310 [1] E. Remera *et al.*, Towards elimination of mother-to-child transmission of HIV in  
311 Rwanda: a nested case-control study of risk factors for transmission, *BMC Pregnancy*  
312 *Childbirth*, vol. 21, no. 1, p. 339, 2021, doi: 10.1186/s12884-021-03806-5.
- 313 [2] A. C. Ubesie, Pediatric HIV/AIDS in sub-Saharan Africa: emerging issues and way  
314 forward., *Afr. Health Sci.*, vol. 12, no. 3, pp. 297–304, Sep. 2012, doi:  
315 10.4314/ahs.v12i3.8.
- 316 [3] L. Tudor Car *et al.*, The Uptake of Integrated Perinatal Prevention of Mother-to-Child  
317 HIV Transmission Programs in Low- and Middle-Income Countries: A Systematic  
318 Review, *PLoS One*, vol. 8, no. 3, p. e56550, Mar. 2013, [Online]. Available:  
319 <https://doi.org/10.1371/journal.pone.0056550>.
- 320 [4] M. Jashi *et al.*, Informing policy and programme decisions for scaling up the PMTCT  
321 and paediatric HIV response through joint technical missions, *Health Policy Plan.*, vol.  
322 28, no. 4, pp. 367–374, Jul. 2013, doi: 10.1093/heapol/czs067.
- 323 [5] M. Lallemand, S. Chang, R. Cohen, and B. Pecoul, Pediatric HIV — A Neglected  
324 Disease?, *N. Engl. J. Med.*, vol. 365, no. 7, pp. 581–583, Aug. 2011, doi:  
325 10.1056/NEJMp1107275.

- 326 [6] *Government of Malawi- Ministry of Health, Malawi Integrated Guidelines for Clinical*  
327 *Management of HIV/AIDS, 2018.*
- 328 [7] *Malawi Ministry of Health. Department HIV/AIDS Management Information System,*  
329 *Ministry of Health Malawi, 2021.*
- 330 [8] G. G. Sherman *et al.*, Toward elimination of mother-to-child transmission of HIV in  
331 South Africa: how best to monitor early infant infections within the Prevention of  
332 Mother-to-Child Transmission Program, *J. Glob. Health*, vol. 7, no. 1, p. 10701, Jun.  
333 2017, doi: 10.7189/jogh.07.010701.
- 334 [9] A. E. Goga *et al.*, Population-level effectiveness of PMTCT Option A on early mother-  
335 to-child (MTCT) transmission of HIV in South Africa: implications for eliminating  
336 MTCT, *J. Glob. Health*, vol. 6, no. 2, p. 20405, Dec. 2016, doi:  
337 10.7189/jogh.6.020405.
- 338 [10] W. F. Ng'ambi *et al.*, Follow-up and programmatic outcomes of HIV-exposed infants  
339 registered in a large HIV centre in Lilongwe, Malawi: 2012–2014, *Trop. Med. Int.*  
340 *Heal.*, vol. 21, no. 8, pp. 995–1002, Aug. 2016, doi: <https://doi.org/10.1111/tmi.12727>.
- 341 [11] M. Khanam, S. Goswami, and P. Mukhopadhyay, Effectiveness of Early Infant  
342 Diagnosis (EID) in Detecting the Serostatus of HIV-Exposed Infants and Children., *J.*  
343 *Obstet. Gynaecol. India*, vol. 65, no. 5, pp. 315–319, Oct. 2015, doi: 10.1007/s13224-  
344 014-0632-2.
- 345 [12] V. L. Flax, G. Hamela, I. Mofolo, M. C. Hosseinipour, I. F. Hoffman, and S. Maman,  
346 Factors influencing postnatal Option B+ participation and breastfeeding duration  
347 among HIV-positive women in Lilongwe District, Malawi: A qualitative study, *PLoS*  
348 *One*, vol. 12, no. 4, pp. 1–13, 2017, doi: 10.1371/journal.pone.0175590.
- 349 [13] National Statistical Office, Malawi Demographic and Health Survey 2015-16, *Natl.*  
350 *Stat. Off. DHS Progr.*, pp. 1–658, 2015, [Online]. Available:  
351 <http://dhsprogram.com/pubs/pdf/FR319/FR319.pdf>.
- 352 [14] L. C. Zulu, E. Kalipeni, and E. Johannes, Analyzing spatial clustering and the  
353 spatiotemporal nature and trends of HIV/AIDS prevalence using GIS: the case of  
354 Malawi, 1994-2010, *BMC Infect. Dis.*, vol. 14, no. 1, p. 285, 2014, doi: 10.1186/1471-  
355 2334-14-285.
- 356 [15] J. J. Nutor, H. O. Duah, P. Agbadi, P. A. Duodu, and K. W. Gondwe, Spatial analysis  
357 of factors associated with HIV infection in Malawi: indicators for effective prevention,  
358 *BMC Public Health*, vol. 20, no. 1, p. 1167, 2020, doi: 10.1186/s12889-020-09278-0.
- 359 [16] A. Thiabaud, I. Triulzi, E. Orel, K. Tal, and O. Keiser, Social, Behavioral, and Cultural  
360 factors of HIV in Malawi: Semi-Automated Systematic Review, *J Med Internet Res*,  
361 vol. 22, no. 8, p. e18747, 2020, doi: 10.2196/18747.
- 362 [17] C. Feldacker, M. Emch, and S. Ennett, The who and where of HIV in rural Malawi:  
363 Exploring the effects of person and place on individual HIV status, *Health Place*, vol.  
364 16, no. 5, pp. 996–1006, Sep. 2010, doi: 10.1016/j.healthplace.2010.06.004.
- 365 [18] H. Kanyerere *et al.*, The rise and fall of tuberculosis in Malawi: associations with HIV  
366 infection and antiretroviral therapy., *Trop. Med. Int. Health*, vol. 21, no. 1, pp. 101–

367 107, Jan. 2016, doi: 10.1111/tmi.12630.

368 [19] UNAIDS, Understanding Fast-Track Targets. Accelerating action to end the AIDS

369 epidemic by 2030,” *Unaid*s, p. 12, 2015, [Online]. Available:

370 [https://www.unaids.org/sites/default/files/media\\_asset/201506\\_JC2743\\_Understanding\\_Fast](https://www.unaids.org/sites/default/files/media_asset/201506_JC2743_Understanding_Fast)

371 [Track\\_en.pdf](#).

372

373

374 **Table 1: Characteristics of HIV-exposed Infants with DNA-PCR HIV test results**  
 375 **between 2013 and 2020 in Malawi**

| <b>Patient characteristics</b>        | <b>n (%)</b>    |
|---------------------------------------|-----------------|
| <b>Total</b>                          | 255,229 (100.0) |
| <b>Gender</b>                         |                 |
| <i>Male</i>                           | 122,610 (48.0)  |
| <i>Female</i>                         | 125,275 (49.1)  |
| <i>Missing</i>                        | 7,344 (2.9)     |
| <b>Location</b>                       |                 |
| <i>Rural</i>                          | 168,258 (65.9)  |
| <i>Urban</i>                          | 86,971 (34.1)   |
| <b>Age at Sample draw (in months)</b> |                 |
| <i>0-1</i>                            | 145,622 (57.1)  |
| <i>2-5</i>                            | 74,707 (29.3)   |
| <i>6-11</i>                           | 21,307 (8.4)    |
| <i>12-17</i>                          | 3,337 (1.3)     |
| <i>18-24</i>                          | 1,902 (0.8)     |
| <i>Missing</i>                        | 8,354 (3.3)     |
| <b>Region</b>                         |                 |
| <i>Northern</i>                       | 22,897 (9.0)    |
| <i>Central</i>                        | 72,633 (28.5)   |
| <i>Southern</i>                       | 159,699 (62.6)  |
| <b>Year Sample drawn</b>              |                 |
| <i>2013</i>                           | 16,308 (6.4)    |
| <i>2014</i>                           | 25,858 (10.1)   |
| <i>2015</i>                           | 41,271 (16.2)   |
| <i>2016</i>                           | 41,178 (16.1)   |
| <i>2017</i>                           | 42,252 (16.6)   |
| <i>2018</i>                           | 43,370 (17.0)   |
| <i>2019</i>                           | 36,372 (14.3)   |
| <i>2020*</i>                          | 7,741 (3.0)     |
| <i>Missing</i>                        | 879 (0.3)       |

376 \*The data is from January to June

377 **Table 2: Factors associated with HIV prevalence among HIV-exposed infants with DNA-PCR HIV tests between 2013 and 2020 in**  
 378 **Malawi**

| Patient characteristics (n=235,774)   | n       | no. of infants with HIV positive results | HIV Prevalence among HIV-exposed infants in % (95%CI) | Crude*              |         | Adjusted* <sup>‡</sup> |         |
|---------------------------------------|---------|------------------------------------------|-------------------------------------------------------|---------------------|---------|------------------------|---------|
|                                       |         |                                          |                                                       | OR (95%CI)          | P-value | OR (95%CI)             | P-value |
| <b>Total</b>                          | 235,774 | 16,936                                   | 7.18 (7.08-7.29)                                      |                     |         |                        |         |
| <b>Gender</b>                         |         |                                          |                                                       |                     | <0.001  |                        | <0.001  |
| <i>Male</i>                           | 122,610 | 5,485                                    | 6.95 (6.80-7.09)                                      | 1.00                |         | 1.00                   |         |
| <i>Female</i>                         | 125,275 | 5,948                                    | 7.41 (7.27-7.56)                                      | 1.07 (1.04-1.11)    |         | 1.07 (1.03-1.10)       |         |
| <b>Location</b>                       |         |                                          |                                                       |                     | 0.001   |                        | <0.001  |
| <i>Rural</i>                          | 168,258 | 6,843                                    | 6.83 (6.71-6.96)                                      | 1.00                |         | 1.00                   |         |
| <i>Urban</i>                          | 86,971  | 2,568                                    | 7.87 (7.68-8.05)                                      | 1.06 (1.02-1.10)    |         | 1.22 (1.17-1.27)       |         |
| <b>Age at Sample draw (in months)</b> |         |                                          |                                                       |                     | <0.001  |                        | <0.001  |
| <i>0-1</i>                            | 145,622 | 2,807                                    | 2.89 (2.80-2.98)                                      | 1.00                |         | 1.00                   |         |
| <i>2-5</i>                            | 74,707  | 4,176                                    | 8.60 (8.39-8.80)                                      | 3.20 (3.07-3.33)    |         | 3.47 (3.33-3.62)       |         |
| <i>6-11</i>                           | 21,307  | 3,011                                    | 22.71 (22.13-23.29)                                   | 9.78 (9.35-10.23)   |         | 10.52 (10.04-11.02)    |         |
| <i>12-17</i>                          | 3,337   | 779                                      | 41.46 (39.72-43.21)                                   | 24.17 (22.39-26.09) |         | 24.02 (22.22-25.96)    |         |
| <i>18-24</i>                          | 1,902   | 542                                      | 51.72 (49.39-54.04)                                   | 37.21 (33.61-41.19) |         | 36.24 (32.69-40.17)    |         |
| <b>Region</b>                         |         |                                          |                                                       |                     |         |                        | 0.042   |
| <i>Northern</i>                       | 22,897  | 1,383                                    | 8.89 (8.51-9.28)                                      | 1.00                | 0.001   | 1.00                   |         |
| <i>Central</i>                        | 72,633  | 3,158                                    | 7.71 (7.50-7.91)                                      | 0.81 (0.67-0.97)    |         | 0.84 (0.70-1.01)       |         |
| <i>Southern</i>                       | 159,699 | 7,191                                    | 6.71 (6.59-6.84)                                      | 0.71 (0.60-0.85)    |         | 0.80 (0.67-0.95)       |         |
| <b>Year Sample drawn</b>              |         |                                          |                                                       |                     | <0.001  |                        | <0.001  |
| <i>2013</i>                           | 14,984  | 1,041                                    | 6.95 (6.54-7.35)                                      | 1.00                |         | 1.00                   |         |
| <i>2014</i>                           | 24,375  | 1,517                                    | 6.22 (5.92-6.53)                                      | 0.95 (0.88-1.03)    |         | 1.01 (0.93-1.10)       |         |
| <i>2015</i>                           | 38,513  | 2,161                                    | 5.61 (5.38-5.84)                                      | 0.85 (0.79-0.91)    |         | 0.95 (0.88-1.03)       |         |
| <i>2016</i>                           | 37,281  | 2,399                                    | 6.43 (6.19-6.68)                                      | 1.00 (0.93-1.07)    |         | 1.15 (1.06-1.24)       |         |
| <i>2017</i>                           | 39,672  | 3,857                                    | 9.72 (9.43-10.01)                                     | 1.56 (1.46-1.67)    |         | 1.89 (1.75-2.04)       |         |
| <i>2018</i>                           | 41,420  | 3,516                                    | 8.45 (8.22-8.76)                                      | 1.34 (1.25-1.44)    |         | 1.64 (1.52-1.77)       |         |
| <i>2019</i>                           | 34,163  | 2,238                                    | 6.55 (6.29-6.81)                                      | 1.05 (0.97-1.13)    |         | 1.37 (1.26-1.48)       |         |

|     | 2020 <sup>§</sup>                                                                                             | 5,366 | 207 | 3.86 (3.34-4.37) | 0.76 (0.66-0.87) | 0.86 (0.72-1.01) |
|-----|---------------------------------------------------------------------------------------------------------------|-------|-----|------------------|------------------|------------------|
| 379 | ζBetween district variation (σ)of HIV prevalence: 16.12% (95% CI: 11.88-21.90)                                |       |     |                  |                  |                  |
| 380 | ζWithin district variation (rho) of HIV prevalence: 0.78% (95% CI: 0.43-1.44)                                 |       |     |                  |                  |                  |
| 381 | OR=Odds ratio                                                                                                 |       |     |                  |                  |                  |
| 382 | 95%CI=95% Confidence Interval                                                                                 |       |     |                  |                  |                  |
| 383 | HIV=Human Immunodeficiency Virus                                                                              |       |     |                  |                  |                  |
| 384 | * Multiple imputation was used to generate the OR and their associated 95% confidence intervals and p-values. |       |     |                  |                  |                  |
| 385 | §The data for the year 2020 is from January to June                                                           |       |     |                  |                  |                  |



**Figure 1: Temporal Trend in HIV prevalence amongst HIV exposed infants in Malawi across the Northern, Central and Southern Regions between 2013 and 2020**

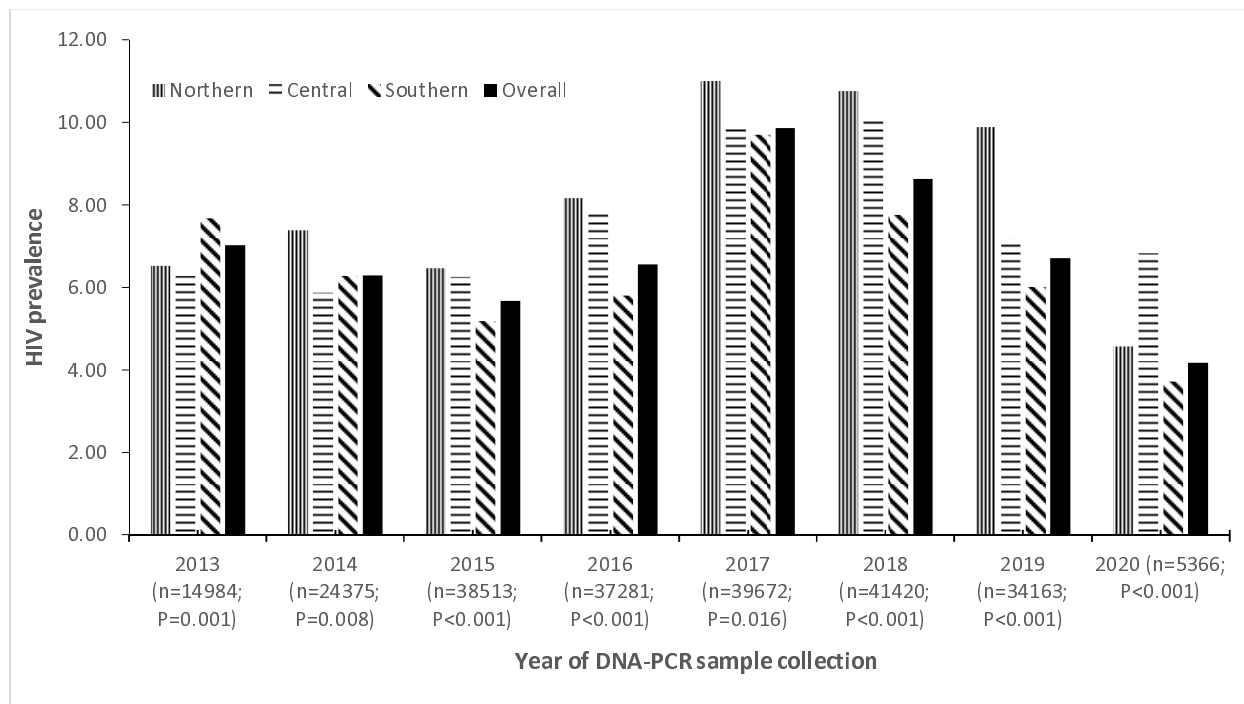

DNA-PCR= HIV DNA Polymerase Chain Reaction Tests

**Figure 2: Pooled HIV Prevalence among the HIV Exposed Infants with HIV-DNA PCR Tests in Malawi between 2013 and 2020**

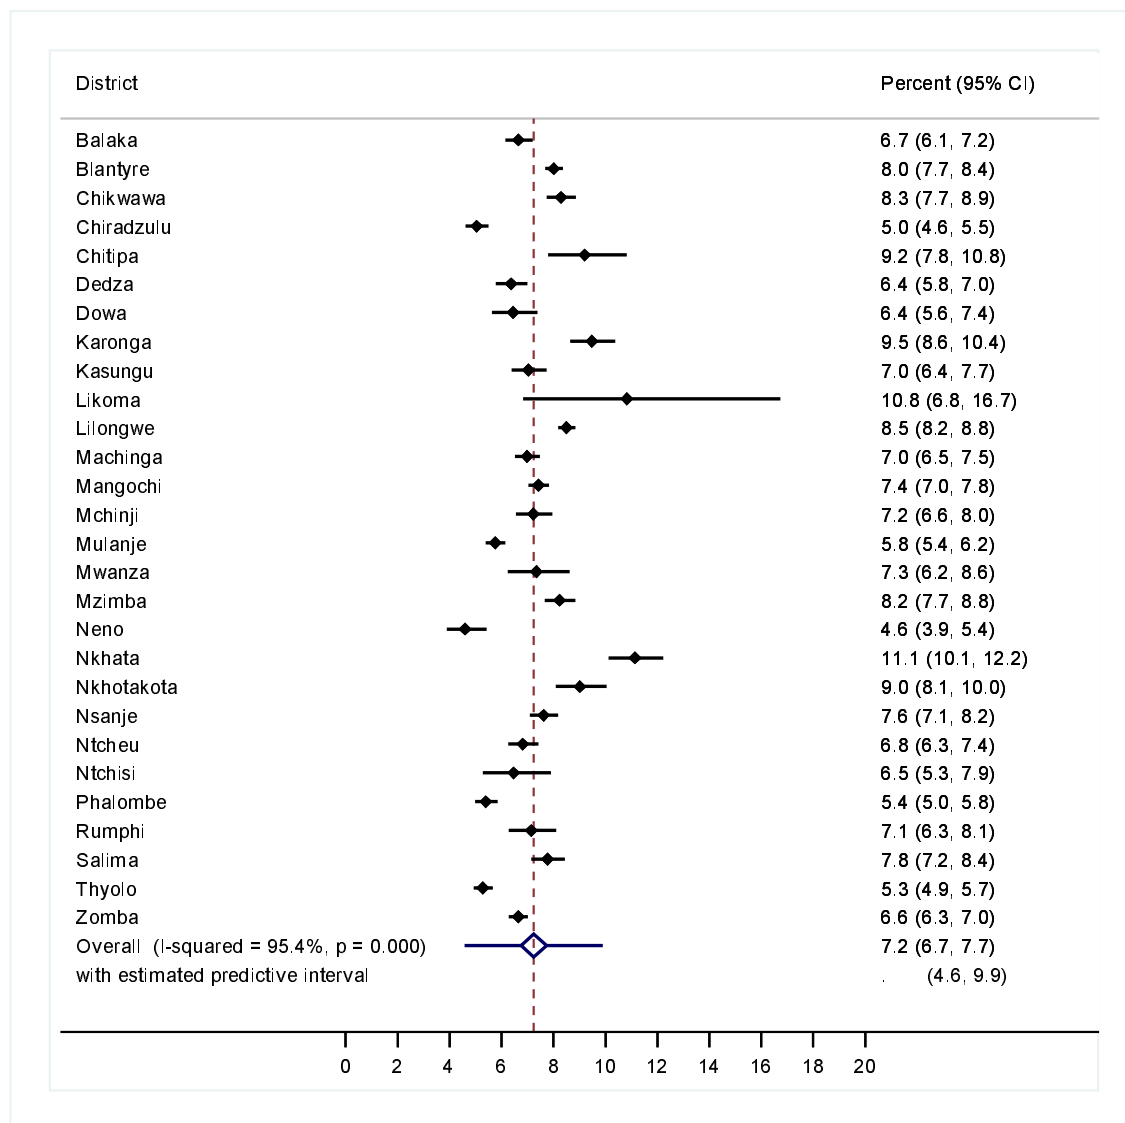

Source: https://medrxiv.org/content/10.1101/2021.10.06.21264671v1.full.pdf
